# Supplementary material for: A complex imprinted polymer membrane combined with solid phase fluorescence detection for selective analysis of l-phenylalanine in water-abundant samples
Source: Royal Society of Chemistry journal article supplement (doi:10.1039/c3ay40745d), 2013-01-01
Supplement: c3ay40745d.pdf [file c3ay40745d.pdf]

# **A complex imprinted polymer membrane combined with solid phase fluorescence detection for selective analysis of *L*-phenylalanine in water-abundant samples**

Jianxiang Huang, Yuling Hu\*, Gongke Li\*

*School of Chemistry and Chemical Engineering, Sun Yat-sen University, Guangzhou, 510275, China*

\* Corresponding author: Gongke Li, Yuling Hu

Tel. : +86-20-84110922

Fax : +86-20-84115107

E-mail : cesgkl@mail.sysu.edu.cn

ceshyl@mail.sysu.edu.cn

## Supplementary Material

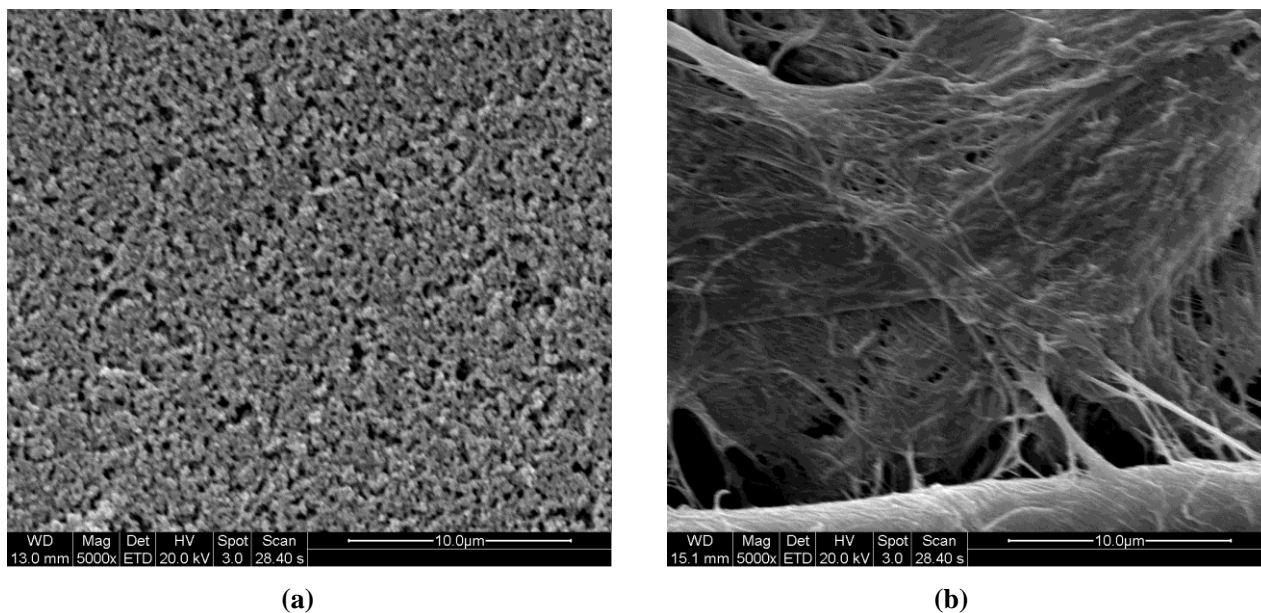

**Fig. S1** Scanning electron micrographs of FP substrate and CIP membrane.

Magnifications: 5000.

(a) CIP membrane, (b) FP substrate.

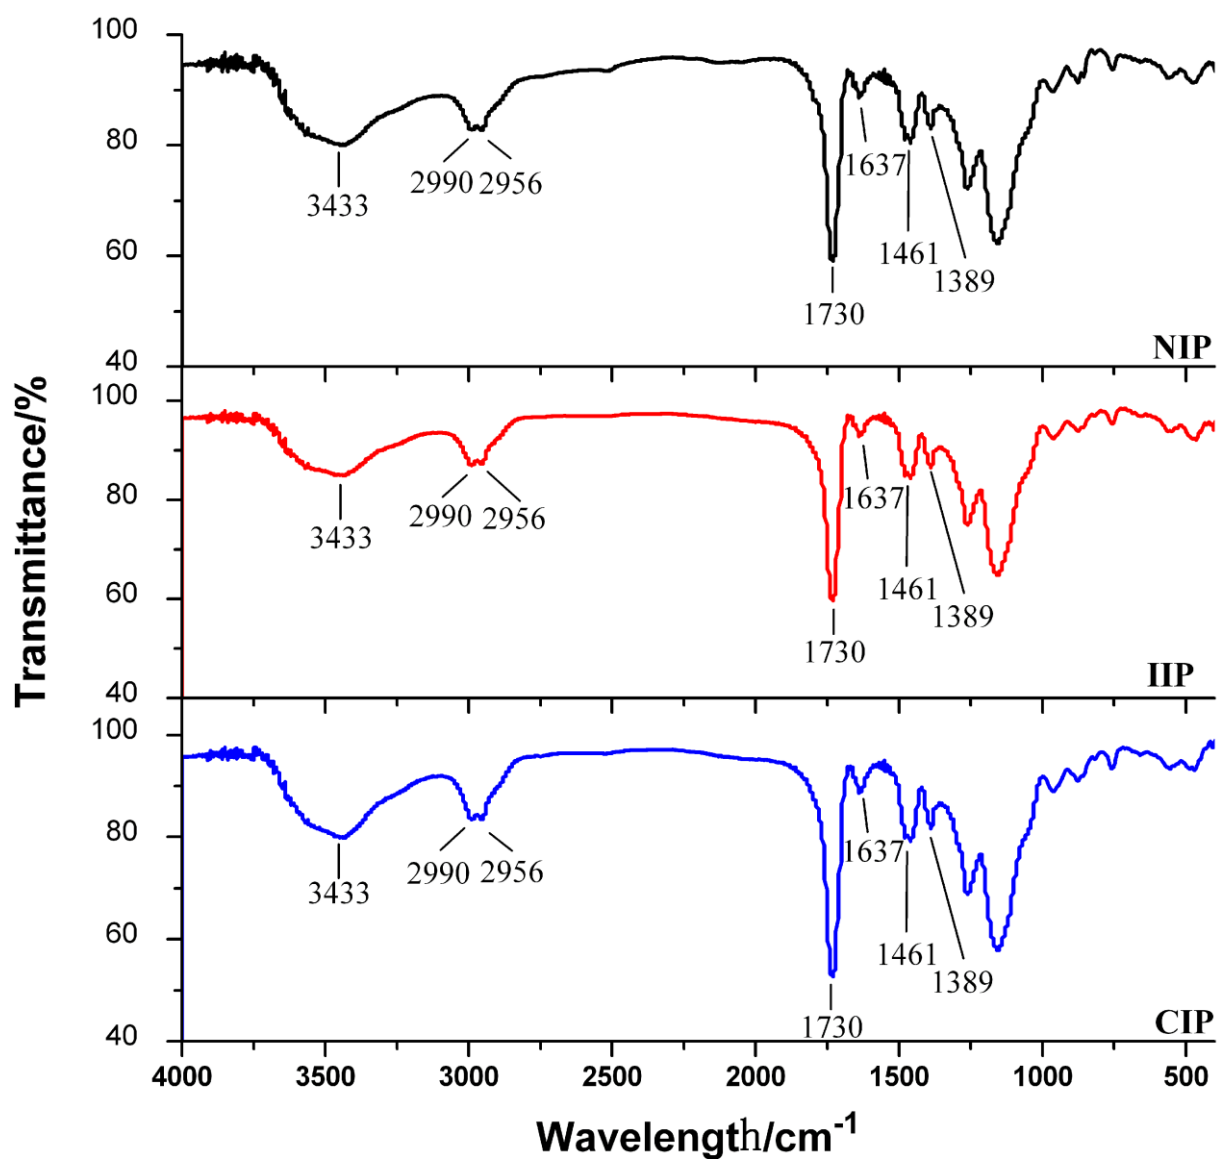

**Fig. S2** Infrared spectra of CIP, IIP and NIP.
